# Supplementary material for: Disease-specific haptoglobin-β chain N-glycosylation as biomarker to differentiate non-small cell lung cancer from benign lung diseases
Source: PubMed Central journal article supplement (PMC6843889; doi:10.7150/jca.32690), 2019-09-07
Supplement: jcav10p5628s1.pdf [file jcav10p5628s1.pdf]

## Supporting Information

### **Disease-specific haptoglobin- $\beta$ chain N-glycosylation as biomarker to differentiate non-small cell lung cancer from benign lung diseases**

Tianjing Chen<sup>1</sup>, Chengyan He<sup>2</sup>, Mo Zhang<sup>1</sup>, Xiaoou Li<sup>3</sup>, Xiaofeng Liu<sup>3</sup>, Yujie Liu<sup>1</sup>,  
Dan Zhang<sup>1</sup>, and Zhili Li<sup>1,\*</sup>

1. Department of Biophysics and Structural Biology, Institute of Basic Medical Sciences, Chinese Academy of Medical Sciences & School of Basic Medicine, Peking Union Medical College, Beijing, PR China
2. Clinical Lab Diagnosis, China-Japan Union Hospital, Jilin University, Changchun, PR China
3. Department of Laboratory, Tumor Hospital of Jilin Province, Changchun, PR China

**\*Corresponding author:** Zhili Li, Department of Biophysics and Structural Biology, Institute of Basic Medical Sciences, Chinese Academy of Medical Sciences & School of Basic Medicine, Peking Union Medical College, 5 Dongdan San Tiao, Beijing 100005, PR China

Tel/Fax: +86-10-69156479

E-mail: lizhili@ibms.pumc.edu.cn

**Table S1.** Patterns of serum IIRPCs of patients with NSCLC and BLDs

|            | a     | b     | c     | d    | e    | f    | g    |
|------------|-------|-------|-------|------|------|------|------|
| BLDs       | 122   | 88    | 64    | 3    | 4    | 11   | 8    |
| NSCLC      | 147   | 111   | 28    | 4    | 3    | 5    | 2    |
| Total      | 269   | 199   | 92    | 7    | 7    | 16   | 10   |
| Percentage | 44.8% | 33.2% | 15.3% | 1.2% | 1.2% | 2.7% | 1.7% |

Percentage of cases (x)=number(x)/number(a + b + c + d + e + f + g); BLDs, benign lung diseases; NSCLC, non-small cell lung cancer.

**Table S2.** Comparison of the N-glycopeptides, N-glycopeptide ratios, and N-glycosylation features of DSHp- $\beta$  between patterns a and b in BLDs or NSCLC patients.

| N-glycopeptides, N-glycopeptide ratios and N-glycosylation features | BLDs           |                               | NSCLC          |                               |
|---------------------------------------------------------------------|----------------|-------------------------------|----------------|-------------------------------|
|                                                                     | <i>p</i> value | <i>p</i> <sub>adj</sub> value | <i>p</i> value | <i>p</i> <sub>adj</sub> value |
| <b>VVLHPN<sub>241</sub>YSQVDIGLIK</b>                               |                |                               |                |                               |
| G2                                                                  | <b>0.019</b>   | 0.147                         | 0.789          | 0.891                         |
| G2S                                                                 | 0.965          | 1.015                         | 0.278          | 0.679                         |
| G2S2                                                                | <b>0.028</b>   | 0.188                         | 0.305          | 0.715                         |
| G2/G2S                                                              | <b>0.004</b>   | 0.113                         | 0.153          | 0.585                         |
| G2/G2S2                                                             | <b>0.005</b>   | 0.096                         | 0.575          | 0.856                         |
| G2S/G2S2                                                            | <b>0.049</b>   | 0.211                         | 0.850          | 0.894                         |
| <b>NLFLN<sub>207</sub>HSEN<sub>211</sub>ATAK</b>                    |                |                               |                |                               |
| G2G2                                                                | 0.349          | 0.626                         | 0.093          | 0.434                         |
| G2G2S                                                               | 0.455          | 0.711                         | 0.210          | 0.581                         |
| G2G3                                                                | 0.764          | 0.863                         | <b>0.019</b>   | 0.288                         |
| G2G2S2                                                              | 0.228          | 0.479                         | 0.593          | 0.861                         |
| G2G3S                                                               | 0.133          | 0.368                         | 0.209          | 0.608                         |
| G2G4                                                                | 1.000          | 1.017                         | <b>0.042</b>   | 0.423                         |
| G2G3FS                                                              | 0.412          | 0.680                         | 0.112          | 0.456                         |
| G2G2S3                                                              | 0.531          | 0.705                         | 0.568          | 0.888                         |
| G2G3S2                                                              | 0.089          | 0.300                         | 0.328          | 0.689                         |
| G2G4S                                                               | 0.414          | 0.664                         | 0.188          | 0.572                         |
| G2G3FS2                                                             | 0.092          | 0.295                         | <b>0.001</b>   | <b>0.035</b>                  |
| G2G2S4                                                              | 0.486          | 0.722                         | 0.391          | 0.746                         |
| G2G3S3                                                              | 0.179          | 0.455                         | 0.867          | 0.881                         |
| G2G4S2                                                              | 0.958          | 1.025                         | 0.370          | 0.728                         |
| G2G3FS3                                                             | 0.872          | 0.967                         | 0.176          | 0.564                         |
| G2G3S4                                                              | 0.610          | 0.715                         | 0.811          | 0.900                         |
| G2G4S3                                                              | <b>0.048</b>   | 0.224                         | 0.064          | 0.392                         |
| G2G2/G2G2S2                                                         | <b>0.009</b>   | 0.107                         | 0.820          | 0.893                         |
| G2G2S2/G2G2S3                                                       | 0.050          | 0.204                         | 0.484          | 0.819                         |
| G2G2/G2G2S                                                          | <b>0.036</b>   | 0.200                         | 0.613          | 0.814                         |
| G2G2/G2G2S3                                                         | 0.206          | 0.465                         | 0.707          | 0.845                         |
| G2G2/G2G2S4                                                         | 0.309          | 0.589                         | 0.659          | 0.856                         |
| G2G3/G2G3S                                                          | 0.599          | 0.730                         | 0.820          | 0.878                         |
| G2G3/G2G3S2                                                         | <b>0.037</b>   | 0.189                         | 0.367          | 0.746                         |
| G2G3/G2G3S3                                                         | 0.515          | 0.698                         | 0.780          | 0.898                         |
| G2G3/G2G3S4                                                         | 0.554          | 0.704                         | <b>0.042</b>   | 0.363                         |
| G2G3S/G2G3S2                                                        | 0.498          | 0.723                         | 0.855          | 0.884                         |
| G2G3S/G2G3S3                                                        | 0.285          | 0.580                         | 0.166          | 0.597                         |

|                 |              |       |              |       |
|-----------------|--------------|-------|--------------|-------|
| G2G3S/G2G3S4    | 0.130        | 0.378 | 0.233        | 0.618 |
| G2G3S2/G2G3S3   | 0.189        | 0.443 | 0.448        | 0.805 |
| G2G3S2/G2G3S4   | 0.183        | 0.448 | 0.700        | 0.853 |
| G2G3S3/G2G3S4   | 0.168        | 0.445 | 0.400        | 0.739 |
| G2G2S/G2G2S2    | 0.966        | 0.999 | 0.171        | 0.579 |
| G2G2S/G2G2S3    | 0.208        | 0.453 | 0.272        | 0.692 |
| G2G2S/G2G2S4    | 0.109        | 0.333 | 0.713        | 0.837 |
| G2G2S2/G2G2S4   | 0.003        | 0.186 | 0.603        | 0.836 |
| G2G2S3/G2G2S4   | 0.053        | 0.204 | 0.096        | 0.417 |
| G2G3FS/G2G3FS2  | <b>0.009</b> | 0.081 | 0.941        | 0.941 |
| G2G3FS/G2G3FS3  | 0.079        | 0.284 | 0.601        | 0.853 |
| G2G3FS2/G2G3FS3 | 0.499        | 0.708 | 0.456        | 0.795 |
| G2G4/G2G4S      | 0.564        | 0.702 | 0.016        | 0.320 |
| G2G4/G2G4S2     | 1.000        | 1.000 | 0.044        | 0.297 |
| G2G4/G2G4S3     | 0.380        | 0.662 | 0.025        | 0.307 |
| G2G4S/G2G4S2    | 0.759        | 0.874 | 0.487        | 0.803 |
| G2G4S/G2G4S3    | 0.553        | 0.717 | 0.305        | 0.689 |
| G2G4S2/G2G4S3   | 0.505        | 0.700 | 0.611        | 0.829 |
| G2G3FS/G2G3S    | <b>0.009</b> | 0.089 | 0.571        | 0.871 |
| G2G3FS2/G2G3S2  | 0.408        | 0.691 | 0.067        | 0.374 |
| G2G3FS3/G2G3S3  | 0.299        | 0.588 | <b>0.015</b> | 0.471 |
| S1              | 0.602        | 0.720 | 0.666        | 0.846 |
| S2              | <b>0.009</b> | 0.131 | 0.314        | 0.685 |
| S3              | 0.457        | 0.696 | 0.526        | 0.844 |
| S4              | 0.909        | 0.990 | 0.697        | 0.868 |
| S               | <b>0.034</b> | 0.210 | 0.088        | 0.448 |
| F               | 0.346        | 0.639 | <b>0.043</b> | 0.324 |

A *p* value of <0.05 was considered to be statistically significant.

BLDs patients:

pattern a: sex(M/F), 24/24; age(mean, range), 55.0,30-70 (pulmonary sarcoidosis (n=32), pneumonia (n=8), and interstitial lung disease(n=8)).

pattern b: sex(M/F):24/25, age(mean, range):56.9,31-73 (pulmonary sarcoidosis (n=33), pneumonia(n=7), and interstitial lung disease(n=9)).

NSCLC patients:

pattern a: sex(M/F), 73/74; age(mean, range), 57.3,33-77.

Pattern b: sex(M/F), 54/56; age(mean, range), 58.1,35-74.

M: male; F: female.

**Table S3.** The detected N-glycopeptides of DSHp- $\beta$  and their potential glycan structures

| Glycopeptides                                    | Experimental<br><i>m/z</i> | Theoretical<br><i>m/z</i> | Error<br>(Da) | Accuracy<br>(ppm) | potential glycan structure/mass                                                                                                                                                             | Glycan formula                                                                                                                                                                                     |
|--------------------------------------------------|----------------------------|---------------------------|---------------|-------------------|---------------------------------------------------------------------------------------------------------------------------------------------------------------------------------------------|----------------------------------------------------------------------------------------------------------------------------------------------------------------------------------------------------|
| <b>VVLHPN<sub>241</sub>YSQVDIGLIK</b>            |                            |                           |               |                   |                                                                                                                                                                                             |                                                                                                                                                                                                    |
| <b>G2</b>                                        | 3417.5018                  | 3418.6958                 | -1.194        | -349.26           |  1640.5922 Da                                                                                            | (Hex) <sub>2</sub> (HexNAc) <sub>2</sub> + (Man) <sub>3</sub> (GlcNAc) <sub>2</sub>                                                                                                                |
| <b>G2S</b>                                       | 3708.6629                  | 3709.7912                 | -1.1283       | -304.14           |  1931.6875 Da                                                                                            | (Hex) <sub>2</sub> (HexNAc) <sub>2</sub> (NeuAc) <sub>1</sub> + (Man) <sub>3</sub> (GlcNAc) <sub>2</sub>                                                                                           |
| <b>G2S2</b>                                      | 3999.8862                  | 4000.8866                 | -1.0004       | -250.04           |  2222.7829 Da                                                                                            | (Hex) <sub>2</sub> (HexNAc) <sub>2</sub> (NeuAc) <sub>2</sub> + (Man) <sub>3</sub> (GlcNAc) <sub>2</sub>                                                                                           |
| <b>NLFLN<sub>207</sub>HSEN<sub>211</sub>ATAK</b> |                            |                           |               |                   |                                                                                                                                                                                             |                                                                                                                                                                                                    |
| <b>G2G2</b>                                      | 4704.0852                  | 4704.7606                 | -0.6754       | -143.56           | <br> 1640.5922 Da    | [(Hex) <sub>2</sub> (HexNAc) <sub>2</sub> +(Man) <sub>3</sub> (GlcNAc) <sub>2</sub> ] + [(Hex) <sub>2</sub> (HexNAc) <sub>2</sub> +(Man) <sub>3</sub> (GlcNAc) <sub>2</sub> ]                      |
| <b>G2G2S</b>                                     | 4995.8742                  | 4995.856                  | 0.0182        | 3.64              | <br> 1640.5922 Da | [(Hex) <sub>2</sub> (HexNAc) <sub>2</sub> (NeuAc) <sub>1</sub> +(Man) <sub>3</sub> (GlcNAc) <sub>2</sub> ] + [(Hex) <sub>2</sub> (HexNAc) <sub>2</sub> +(Man) <sub>3</sub> (GlcNAc) <sub>2</sub> ] |
| <b>G2G2S2</b>                                    | 5287.2131                  | 5286.9514                 | 0.2617        | 49.50             | <br> 1640.5922 Da | [(Hex) <sub>2</sub> (HexNAc) <sub>2</sub> (NeuAc) <sub>2</sub> +(Man) <sub>3</sub> (GlcNAc) <sub>2</sub> ] + [(Hex) <sub>2</sub> (HexNAc) <sub>2</sub> +(Man) <sub>3</sub> (GlcNAc) <sub>2</sub> ] |

|               |           |           |        |        |                                                                                       |              |                                                                                               |
|---------------|-----------|-----------|--------|--------|---------------------------------------------------------------------------------------|--------------|-----------------------------------------------------------------------------------------------|
| <b>G2G2S3</b> | 5578.4733 | 5578.0468 | 0.4265 | 76.46  |    | 2222.7829 Da | [(Hex)2 (HexNAc)2 (NeuAc)2 +(Man)3 (GlcNAc)2] + [(Hex)2 (HexNAc)2 (NeuAc)1 +(Man)3 (GlcNAc)2] |
|               |           |           |        |        |    | 1931.6875 Da |                                                                                               |
| <b>G2G2S4</b> | 5869.7643 | 5869.1422 | 0.6221 | 106.00 |    | 2222.7829 Da | [(Hex)2 (HexNAc)2 (NeuAc)2 +(Man)3 (GlcNAc)2] + [(Hex)2 (HexNAc)2 (NeuAc)2 +(Man)3 (GlcNAc)2] |
|               |           |           |        |        |    | 2222.7829 Da |                                                                                               |
| <b>G2G3S</b>  | 5361.2831 | 5360.9882 | 0.2949 | 55.01  |    | 2296.8198 Da | [(Hex)3 (HexNAc)3 (NeuAc)1 +(Man)3 (GlcNAc)2] + [(Hex)2 (HexNAc)2 +(Man)3 (GlcNAc)2]          |
|               |           |           |        |        |    | 1640.5922 Da |                                                                                               |
| <b>G2G3</b>   | 5070.9386 | 5069.8928 | 1.0458 | 206.28 |    | 2005.7244 Da | [(Hex)3 (HexNAc)3 +(Man)3 (GlcNAc)2] + [(Hex)2 (HexNAc)2 +(Man)3 (GlcNAc)2]                   |
|               |           |           |        |        |    | 1640.5922 Da |                                                                                               |
| <b>G2G3S3</b> | 5943.8685 | 5943.179  | 0.6895 | 116.02 |    | 2879.0106 Da | [(Hex)3 (HexNAc)3 (NeuAc)3 +(Man)3 (GlcNAc)2] + [(Hex)2 (HexNAc)2 +(Man)3 (GlcNAc)2]          |
|               |           |           |        |        |   | 1640.5922 Da |                                                                                               |
| <b>G2G3S4</b> | 6235.3923 | 6234.2744 | 1.1179 | 179.32 |  | 2879.0106 Da | [(Hex)3 (HexNAc)3 (NeuAc)3 +(Man)3 (GlcNAc)2] + [(Hex)2 (HexNAc)2 (NeuAc)1+(Man)3 (GlcNAc)2]  |
|               |           |           |        |        |  | 1931.6875 Da |                                                                                               |
| <b>G2G3FS</b> | 5507.3909 | 5507.0461 | 0.3448 | 62.61  |  | 2442.8777Da  | [(Hex)3 (HexNAc)3 (NeuAc)1 (Fuc)1 + (Man)3 (GlcNAc)2] + [(Hex)2 (HexNAc)2 + (Man)3(GlcNAc)2]  |

|                |           |           |        |        |                                                                                       |              |                                                                                              |
|----------------|-----------|-----------|--------|--------|---------------------------------------------------------------------------------------|--------------|----------------------------------------------------------------------------------------------|
|                |           |           |        |        |    | 1640.5922 Da |                                                                                              |
| <b>G2G3FS2</b> | 5798.4513 | 5798.1415 | 0.3098 | 53.43  |    | 2733.9731 Da | [(Hex)3 (HexNAc)3 (NeuAc)2 (Fuc)1 + (Man)3 (GlcNAc)2] + [(Hex)2 (HexNAc)2 + (Man)3(GlcNAc)2] |
|                |           |           |        |        |    | 1640.5922 Da |                                                                                              |
| <b>G2G3FS3</b> | 6090.1032 | 6089.2369 | 0.8663 | 142.27 |    | 3025.0685 Da | [(Hex)3 (HexNAc)3 (NeuAc)3 (Fuc)1 + (Man)3 (GlcNAc)2] + [(Hex)2 (HexNAc)2 + (Man)3(GlcNAc)2] |
|                |           |           |        |        |    | 1640.5922 Da |                                                                                              |
| <b>G2G4</b>    | 5435.4077 | 5435.025  | 0.3827 | 70.41  |    | 2370.8566 Da | [(Hex)4 (HexNAc)4 +(Man)3 (GlcNAc)2] + [(Hex)2 (HexNAc)2 +(Man)3 (GlcNAc)2]                  |
|                |           |           |        |        |    | 1640.5922 Da |                                                                                              |
| <b>G2G4S</b>   | 5726.7593 | 5726.1204 | 0.6389 | 111.58 |    | 2661.9520 Da | [(Hex)4 (HexNAc)4 (NeuAc)1 +(Man)3 (GlcNAc)2] + [(Hex)2 (HexNAc)2 +(Man)3 (GlcNAc)2]         |
|                |           |           |        |        |   | 1640.5922 Da |                                                                                              |
| <b>G2G4S2</b>  | 6017.8359 | 6017.2158 | 0.6201 | 103.05 |  | 2953.0474 Da | [(Hex)4 (HexNAc)4 (NeuAc)2 +(Man)3 (GlcNAc)2] + [(Hex)2 (HexNAc)2 +(Man)3 (GlcNAc)2]         |
|                |           |           |        |        |  | 1640.5922 Da |                                                                                              |

**G2G4S3**

6310.4691

6308.3112

2.1579

342.07

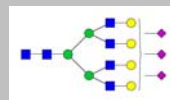

3244.1428 Da

[(Hex)4 (HexNAc)4 (NeuAc)3 +(Man)3 (GlcNAc)2] +

[(Hex)2 (HexNAc)2 +(Man)3 (GlcNAc)2]

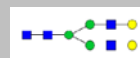

1640.5922 Da



**Table S4.** The relative standard deviations (RSDs) of 9 DSHp- $\beta$  N-glycopeptides of the QC sample as external reference.

| <b>Glycosylation site</b> | <b>Asn241</b> |           | <b>Asn207/211</b> |           |           |           |           |           |           |
|---------------------------|---------------|-----------|-------------------|-----------|-----------|-----------|-----------|-----------|-----------|
| <b>Glycopeptide</b>       | G2S2          | G2G2S     | G2G2S2            | G2G2S3    | G2G3S     | G2G3S2    | G2G3S3    | G2G4S2    | G2G4S3    |
| <b><i>m/z</i></b>         | 3999.8862     | 4995.8742 | 5287.2131         | 5578.4733 | 5361.2831 | 5652.6081 | 5943.8685 | 6017.8359 | 6310.4691 |
| <b>RSD (%)</b>            | 19.46         | 19.92     | 15.41             | 18.28     | 19.5      | 16.58     | 16.53     | 19.49     | 19.53     |

**Table S5.** Comparison of the N-glycopeptides, N-glycopeptide ratios, and N-glycosylation features of DSHp- $\beta$  between three different pathological states of BLDs patients with patterns a, b, d, e, f, and g.

| <b>N-glycopeptides, N-glycopeptide ratios and N-glycosylation features</b> | <b><i>p</i> value</b> |
|----------------------------------------------------------------------------|-----------------------|
| <b>VVLHPN<sub>241</sub>YSQVDIGLIK</b>                                      |                       |
| G2                                                                         | 0.892                 |
| G2S                                                                        | 0.973                 |
| G2S2                                                                       | 0.340                 |
| G2/G2S                                                                     | 0.973                 |
| G2/G2S2                                                                    | 0.943                 |
| G2S/G2S2                                                                   | 0.999                 |
| <b>NLFLN<sub>207</sub>HSEN<sub>211</sub>ATAK</b>                           |                       |
| G2G2                                                                       | 0.698                 |
| G2G2S                                                                      | 0.143                 |
| G2G3                                                                       | 0.710                 |
| G2G2S2                                                                     | 0.858                 |
| G2G3S                                                                      | 0.487                 |
| G2G4                                                                       | 0.644                 |
| G2G3FS                                                                     | 0.102                 |
| G2G2S3                                                                     | 0.871                 |
| G2G3S2                                                                     | 0.355                 |
| G2G4S                                                                      | 0.814                 |
| G2G3FS2                                                                    | 0.361                 |
| G2G2S4                                                                     | 0.859                 |
| G2G3S3                                                                     | 0.789                 |
| G2G4S2                                                                     | 0.755                 |
| G2G3FS3                                                                    | 0.460                 |
| G2G3S4                                                                     | 0.161                 |
| G2G4S3                                                                     | 0.239                 |
| G2G2/G2G2S2                                                                | 0.313                 |
| G2G2S2/G2G2S3                                                              | 0.060                 |
| G2G2/G2G2S                                                                 | 0.821                 |
| G2G2/G2G2S3                                                                | 0.120                 |
| G2G2/G2G2S4                                                                | 0.186                 |
| G2G3/G2G3S                                                                 | 0.248                 |
| G2G3/G2G3S2                                                                | 0.802                 |
| G2G3/G2G3S3                                                                | 0.928                 |
| G2G3/G2G3S4                                                                | 0.540                 |
| G2G3S/G2G3S2                                                               | 0.729                 |
| G2G3S/G2G3S3                                                               | 0.370                 |
| G2G3S/G2G3S4                                                               | 0.745                 |
| G2G3S2/G2G3S3                                                              | 0.138                 |

| <b>N-glycopeptides, N-glycopeptide ratios and N-glycosylation features</b> | <b><i>p</i> value</b> |
|----------------------------------------------------------------------------|-----------------------|
| G2G3S2/G2G3S4                                                              | 0.242                 |
| G2G3S3/G2G3S4                                                              | 0.252                 |
| G2G2S/G2G2S2                                                               | 0.285                 |
| G2G2S/G2G2S3                                                               | 0.142                 |
| G2G2S/G2G2S4                                                               | 0.431                 |
| G2G2S2/G2G2S4                                                              | 0.458                 |
| G2G2S3/G2G2S4                                                              | 0.933                 |
| G2G3FS/G2G3FS2                                                             | 0.101                 |
| G2G3FS/G2G3FS3                                                             | 0.206                 |
| G2G3FS2/G2G3FS3                                                            | 0.981                 |
| G2G4/G2G4S                                                                 | 0.222                 |
| G2G4/G2G4S2                                                                | 0.258                 |
| G2G4/G2G4S3                                                                | 0.936                 |
| G2G4S/G2G4S2                                                               | 0.980                 |
| G2G4S/G2G4S3                                                               | 0.690                 |
| G2G4S2/G2G4S3                                                              | 0.876                 |
| G2G3FS/G2G3S                                                               | 0.959                 |
| G2G3FS2/G2G3S2                                                             | 0.251                 |
| G2G3FS3/G2G3S3                                                             | 0.169                 |
| S1                                                                         | 0.508                 |
| S2                                                                         | 0.719                 |
| S3                                                                         | 0.856                 |
| S4                                                                         | 0.250                 |
| S                                                                          | 0.671                 |
| F                                                                          | 0.650                 |

Three different pathological states of BLDs:

pulmonary sarcoidosis, sex (M/F): 76/85, age (mean, range):56.4, 31-80;

Pneumonia: sex (M/F):16/19, age (mean, range):56.6, 37-77;

Interstitial lung disease: sex (M/F):21/19, age (mean, range):58.8, 30-74.

Statistical analysis was performed by Kruskal-Wallis test ( $\alpha=0.05$ ).

M: male; F: female.

**Table S6.** Comparison of N-glycopeptides, N-glycopeptide ratios, and N-glycosylation features of DSHp- $\beta$  between different staging of NSCLC patients.

| <b>N-glycopeptides, N-glycopeptide ratios,<br/>and N-glycosylation features</b> | <b><i>p</i> value</b> | <b><i>p</i><sub>adj</sub> value</b> |
|---------------------------------------------------------------------------------|-----------------------|-------------------------------------|
| <b>VVLHPN<sub>241</sub>YSQVDIGLIK</b>                                           |                       |                                     |
| G2                                                                              | 0.910                 | 0.994                               |
| G2S                                                                             | 0.942                 | 0.992                               |
| G2S2                                                                            | 0.114                 | 1.677                               |
| G2/G2S                                                                          | 0.533                 | 0.767                               |
| G2/G2S2                                                                         | 0.421                 | 0.856                               |
| G2S/G2S2                                                                        | 0.708                 | 0.853                               |
| <b>NLFLN<sub>207</sub>HSEN<sub>211</sub>ATAK</b>                                |                       |                                     |
| G2G2                                                                            | 0.934                 | 1.002                               |
| G2G2S                                                                           | 0.191                 | 1.409                               |
| G2G2S2                                                                          | 0.294                 | 1.444                               |
| G2G2S3                                                                          | 0.517                 | 0.762                               |
| G2G2S4                                                                          | 0.727                 | 0.858                               |
| G2G3                                                                            | 0.692                 | 0.851                               |
| G2G3S                                                                           | 0.322                 | 1.056                               |
| G2G3S2                                                                          | <b>0.003</b>          | 0.183                               |
| G2G3S3                                                                          | 0.267                 | 1.431                               |
| G2G3S4                                                                          | 0.435                 | 0.754                               |
| G2G4                                                                            | 0.168                 | 1.649                               |
| G2G4S                                                                           | 0.229                 | 1.351                               |
| G2G4S2                                                                          | 0.318                 | 1.250                               |
| G2G4S3                                                                          | 0.430                 | 0.818                               |
| G2G3FS                                                                          | 0.646                 | 0.847                               |
| G2G3FS2                                                                         | 0.443                 | 0.688                               |
| G2G3FS3                                                                         | 0.322                 | 1.186                               |
| G2G2/G2G2S                                                                      | 0.331                 | 1.027                               |
| G2G2/G2G2S2                                                                     | 0.635                 | 0.851                               |
| G2G2/G2G2S3                                                                     | 0.311                 | 1.312                               |
| G2G2S/G2G2S2                                                                    | 0.657                 | 0.843                               |
| G2G2S/G2G2S3                                                                    | 0.362                 | 1.018                               |
| G2G2S/G2G2S4                                                                    | 0.442                 | 0.705                               |
| G2G2S2/G2G2S3                                                                   | 0.302                 | 1.368                               |
| G2G2S2/G2G2S4                                                                   | 0.378                 | 0.970                               |
| G2G2S3/G2G2S4                                                                   | 0.091                 | 1.796                               |
| G2G3/G2G3S                                                                      | 0.901                 | 1.003                               |
| G2G3/G2G3S2                                                                     | 0.405                 | 0.920                               |
| G2G3/G2G3S3                                                                     | 0.506                 | 0.766                               |
| G2G3/G2G3S4                                                                     | 0.439                 | 0.739                               |
| G2G3FS/G2G3FS2                                                                  | 0.751                 | 0.869                               |

| <b>N-glycopeptides, N-glycopeptide ratios,<br/>and N-glycosylation features</b> | <b><i>p</i> value</b> | <b><i>p<sub>adj</sub></i> value</b> |
|---------------------------------------------------------------------------------|-----------------------|-------------------------------------|
| G2G3FS/G2G3FS3                                                                  | 0.607                 | 0.852                               |
| G2G3FS/G2G3S                                                                    | 0.633                 | 0.868                               |
| G2G3FS2/G2G3FS3                                                                 | 0.228                 | 1.491                               |
| G2G3FS2/G2G3S2                                                                  | 0.134                 | 1.577                               |
| G2G3FS3/G2G3S3                                                                  | 0.965                 | 0.982                               |
| G2G3S/G2G3S2                                                                    | 0.431                 | 0.794                               |
| G2G3S/G2G3S3                                                                    | 0.322                 | 1.117                               |
| G2G3S/G2G3S4                                                                    | 0.351                 | 1.035                               |
| G2G3S2/G2G3S3                                                                   | 0.071                 | 2.080                               |
| G2G3S2/G2G3S4                                                                   | 0.184                 | 1.547                               |
| G2G3S3/G2G3S4                                                                   | 0.402                 | 0.948                               |
| G2G4/G2G4S2                                                                     | 0.407                 | 0.889                               |
| G2G4/G2G4S3                                                                     | 0.368                 | 0.987                               |
| G2G4S/G2G4S2                                                                    | 0.678                 | 0.851                               |
| G2G4S/G2G4S3                                                                    | 0.407                 | 0.857                               |
| G2G4S2/G2G4S3                                                                   | 0.427                 | 0.841                               |
| S1                                                                              | 0.991                 | 0.991                               |
| S2                                                                              | 0.395                 | 0.970                               |
| S3                                                                              | 0.433                 | 0.774                               |
| S4                                                                              | 0.814                 | 0.924                               |
| S                                                                               | 0.943                 | 0.976                               |
| F                                                                               | 0.441                 | 0.722                               |

Stage I, sex (M/F):3/3, age (mean, range):62, 50-74;

Stage II, 0;

Stage III: sex (M/F): 6/6, age (mean, range):59.5,51-69;

Stage IV: sex (M/F):15/15, age (mean, range):58.5, 49-69.

Statistical analysis was performed by Kruskal-Wallis test ( $\alpha=0.05$ ).

M: male; F: female.

**Table S7.** Comparison of N-glycopeptides, N-glycopeptide ratios, and N-glycosylation features of DSHp- $\beta$  with sex in BLDs or NSCLC patients.

| N-glycopeptides, N-glycopeptide ratios, and N-glycosylation features | BLDs           |                              | NSCLC          |                              |
|----------------------------------------------------------------------|----------------|------------------------------|----------------|------------------------------|
|                                                                      | <i>p</i> value | <i>p<sub>adj</sub></i> value | <i>p</i> value | <i>p<sub>adj</sub></i> value |
| <b>VVLHPN<sub>241</sub>YSQVDIGLIK</b>                                |                |                              |                |                              |
| G2                                                                   | 0.488          | 0.902                        | 0.829          | 1.032                        |
| G2S                                                                  | 0.440          | 0.994                        | 0.428          | 0.768                        |
| G2S2                                                                 | 0.207          | 0.840                        | 0.114          | 0.463                        |
| G2/G2S                                                               | 0.344          | 0.954                        | 0.228          | 0.662                        |
| G2/G2S2                                                              | 0.927          | 0.943                        | 0.323          | 0.680                        |
| G2S/G2S2                                                             | 0.474          | 0.933                        | 0.860          | 0.990                        |
| <b>NLFLN<sub>207</sub>HSEN<sub>211</sub>ATAK</b>                     |                |                              |                |                              |
| G2G2                                                                 | 0.972          | 0.972                        | 0.710          | 0.963                        |
| G2G2S                                                                | 0.490          | 0.880                        | 0.577          | 0.903                        |
| G2G3                                                                 | 0.836          | 0.911                        | 0.659          | 0.957                        |
| G2G2S2                                                               | 0.791          | 0.911                        | 0.053          | 0.464                        |
| G2G3S                                                                | 0.096          | 0.734                        | 0.887          | 0.967                        |
| G2G4                                                                 | 0.701          | 0.873                        | 0.138          | 0.496                        |
| G2G3FS                                                               | 0.791          | 0.928                        | 0.231          | 0.639                        |
| G2G2S3                                                               | 0.678          | 0.919                        | 0.137          | 0.523                        |
| G2G3S2                                                               | 0.230          | 0.780                        | 0.851          | 1.018                        |
| G2G4S                                                                | 0.064          | 0.645                        | 0.891          | 0.954                        |
| G2G3FS2                                                              | 0.167          | 0.847                        | 0.579          | 0.883                        |
| G2G2S4                                                               | 0.507          | 0.883                        | 0.312          | 0.679                        |
| G2G3S3                                                               | 0.121          | 0.673                        | 0.610          | 0.907                        |
| G2G4S2                                                               | 0.538          | 0.864                        | 0.923          | 0.970                        |
| G2G3FS3                                                              | <b>0.027</b>   | 0.404                        | <b>0.025</b>   | 0.508                        |
| G2G3S4                                                               | 0.483          | 0.921                        | 0.280          | 0.682                        |
| G2G4S3                                                               | 0.913          | 0.944                        | 0.923          | 0.954                        |
| G2G2/G2G2S2                                                          | 0.454          | 0.924                        | 0.156          | 0.527                        |
| G2G2S2/G2G2S3                                                        | 0.831          | 0.922                        | 0.727          | 0.965                        |
| G2G2/G2G2S                                                           | 0.517          | 0.875                        | 0.859          | 1.008                        |
| G2G2/G2G2S3                                                          | 0.704          | 0.859                        | <b>0.028</b>   | 0.420                        |
| G2G2/G2G2S4                                                          | 0.735          | 0.880                        | 0.698          | 0.968                        |
| G2G3/G2G3S                                                           | 0.358          | 0.909                        | 0.570          | 0.914                        |
| G2G3/G2G3S2                                                          | 0.104          | 0.702                        | 0.743          | 0.964                        |
| G2G3/G2G3S3                                                          | 0.454          | 0.954                        | 0.404          | 0.771                        |
| G2G3/G2G3S4                                                          | 0.597          | 0.868                        | <b>0.045</b>   | 0.458                        |
| G2G3S/G2G3S2                                                         | 0.846          | 0.905                        | 0.067          | 0.508                        |
| G2G3S/G2G3S3                                                         | 0.817          | 0.923                        | 0.105          | 0.491                        |

|                 |                  |              |              |       |
|-----------------|------------------|--------------|--------------|-------|
| G2G3S/G2G3S4    | 0.211            | 0.806        | 0.218        | 0.664 |
| G2G3S2/G2G3S3   | 0.700            | 0.890        | 0.298        | 0.673 |
| G2G3S2/G2G3S4   | 0.581            | 0.887        | 0.676        | 0.959 |
| G2G3S3/G2G3S4   | 0.584            | 0.868        | 0.821        | 1.043 |
| G2G2S/G2G2S2    | 0.261            | 0.838        | <b>0.019</b> | 0.565 |
| G2G2S/G2G2S3    | 0.658            | 0.912        | <b>0.042</b> | 0.515 |
| G2G2S/G2G2S4    | 0.655            | 0.929        | 0.841        | 1.026 |
| G2G2S2/G2G2S4   | 0.859            | 0.903        | 0.472        | 0.800 |
| G2G2S3/G2G2S4   | 0.577            | 0.902        | 0.243        | 0.644 |
| G2G3FS/G2G3FS2  | 0.302            | 0.878        | 0.986        | 0.986 |
| G2G3FS/G2G3FS3  | <b>0.023</b>     | 0.474        | 0.280        | 0.657 |
| G2G3FS2/G2G3FS3 | 0.347            | 0.921        | 0.190        | 0.608 |
| G2G4/G2G4S      | 0.450            | 0.980        | 0.974        | 0.990 |
| G2G4/G2G4S2     | 0.688            | 0.912        | 0.500        | 0.824 |
| G2G4/G2G4S3     | 0.186            | 0.872        | 0.352        | 0.694 |
| G2G4S/G2G4S2    | 0.391            | 0.916        | 0.875        | 0.970 |
| G2G4S/G2G4S3    | 0.112            | 0.685        | 0.086        | 0.476 |
| G2G4S2/G2G4S3   | 0.389            | 0.949        | 0.071        | 0.433 |
| G2G3FS/G2G3S    | 0.224            | 0.805        | <b>0.012</b> | 0.743 |
| G2G3FS2/G2G3S2  | <b>0.005</b>     | 0.148        | 0.067        | 0.454 |
| G2G3FS3/G2G3S3  | <b>&lt;0.001</b> | <b>0.003</b> | 0.093        | 0.470 |
| S1              | 0.689            | 0.894        | 0.419        | 0.775 |
| S2              | 0.080            | 0.694        | 0.462        | 0.805 |
| S3              | 0.197            | 0.858        | 0.255        | 0.648 |
| S4              | 0.528            | 0.871        | 0.350        | 0.712 |
| S               | 0.296            | 0.903        | 0.871        | 0.984 |
| F               | 0.056            | 0.681        | 0.107        | 0.464 |

A  $p(p_{adj})$  value of  $< 0.05$  was considered to be statistically significant.

For BLDs patients:

Male (n=111), age (mean, range):57.7, 37-74; female (n=115), age (mean, range):57.5, 37-73.

For NSCLC patients:

Male (n=136), age (mean, range):57.9, 37-73; female ( n=127), age (mean, range):57.0, 37-73.

Table S8. Comparison of the N-glycopeptides, N-glycopeptide ratios, or N-glycosylation features of DSHp- $\beta$  with age in BLDs or NSCLC patients.

| N-glycopeptides, N-glycopeptide ratios,<br>and N-glycosylation features | BLDs           |                               | NSCLC          |                               |
|-------------------------------------------------------------------------|----------------|-------------------------------|----------------|-------------------------------|
|                                                                         | <i>p</i> value | <i>p</i> <sub>adj</sub> value | <i>p</i> value | <i>p</i> <sub>adj</sub> value |
| <b>VVLHPN<sub>241</sub>YSQVDIGLIK</b>                                   |                |                               |                |                               |
| G2                                                                      | 0.714          | 0.947                         | 0.982          | 0.998                         |
| G2S                                                                     | 0.444          | 0.933                         | 0.988          | 0.988                         |
| G2S2                                                                    | 0.113          | 0.861                         | 0.654          | 1.050                         |
| G2/G2S                                                                  | 0.211          | 1.070                         | 0.962          | 1.030                         |
| G2/G2S2                                                                 | 0.312          | 1.002                         | 0.978          | 1.028                         |
| G2S/G2S2                                                                | 0.471          | 0.927                         | 0.332          | 0.920                         |
| <b>NLFLN<sub>207</sub>HSEN<sub>211</sub>ATAK</b>                        |                |                               |                |                               |
| G2G2                                                                    | 0.231          | 0.941                         | <b>0.028</b>   | 1.721                         |
| G2G2S                                                                   | <b>0.027</b>   | 0.811                         | 0.670          | 1.022                         |
| G2G3                                                                    | 0.061          | 0.739                         | 0.660          | 1.032                         |
| G2G2S2                                                                  | 0.085          | 0.868                         | 0.980          | 1.014                         |
| G2G3S                                                                   | 0.191          | 1.058                         | 0.760          | 1.053                         |
| G2G4                                                                    | 0.697          | 0.966                         | 0.126          | 0.769                         |
| G2G3FS                                                                  | 0.365          | 1.011                         | 0.509          | 1.036                         |
| G2G2S3                                                                  | 0.274          | 0.985                         | 0.142          | 0.722                         |
| G2G3S2                                                                  | 0.431          | 0.973                         | 0.790          | 1.048                         |
| G2G4S                                                                   | 0.793          | 0.987                         | 0.896          | 1.012                         |
| G2G3FS2                                                                 | 0.701          | 0.950                         | 0.652          | 1.074                         |
| G2G2S4                                                                  | 0.629          | 1.010                         | 0.373          | 0.949                         |
| G2G3S3                                                                  | 0.386          | 0.980                         | 0.851          | 1.039                         |
| G2G4S2                                                                  | 0.976          | 1.009                         | 0.293          | 0.892                         |
| G2G3FS3                                                                 | 0.855          | 1.023                         | 0.931          | 1.032                         |
| G2G3S4                                                                  | 0.361          | 1.048                         | 0.112          | 0.850                         |
| G2G4S3                                                                  | 0.620          | 1.022                         | 0.210          | 0.754                         |
| G2G2/G2G2S2                                                             | 0.037          | 0.752                         | 0.125          | 0.846                         |
| G2G2S2/G2G2S3                                                           | 0.975          | 1.025                         | 0.083          | 1.271                         |
| G2G2/G2G2S                                                              | <b>0.017</b>   | 1.021                         | 0.090          | 1.093                         |
| G2G2/G2G2S3                                                             | 0.524          | 0.969                         | 0.204          | 0.889                         |
| G2G2/G2G2S4                                                             | 0.655          | 0.999                         | 0.229          | 0.777                         |
| G2G3/G2G3S                                                              | 0.598          | 1.042                         | 0.599          | 1.044                         |
| G2G3/G2G3S2                                                             | 0.549          | 0.985                         | 0.816          | 1.060                         |
| G2G3/G2G3S3                                                             | 0.680          | 0.965                         | 0.627          | 1.062                         |
| G2G3/G2G3S4                                                             | 0.230          | 1.001                         | <b>0.042</b>   | 1.284                         |
| G2G3S/G2G3S2                                                            | 0.973          | 1.041                         | 0.512          | 1.007                         |
| G2G3S/G2G3S3                                                            | 0.900          | 0.998                         | 0.586          | 1.052                         |
| G2G3S/G2G3S4                                                            | 0.997          | 0.997                         | 0.207          | 0.841                         |



|                 |       |       |       |       |
|-----------------|-------|-------|-------|-------|
| G2G3S2/G2G3S3   | 0.992 | 1.009 | 0.375 | 0.915 |
| G2G3S2/G2G3S4   | 0.916 | 0.998 | 0.097 | 0.982 |
| G2G3S3/G2G3S4   | 0.892 | 1.007 | 0.058 | 1.178 |
| G2G2S/G2G2S2    | 0.486 | 0.927 | 0.888 | 1.022 |
| G2G2S/G2G2S3    | 0.666 | 0.991 | 0.128 | 0.712 |
| G2G2S/G2G2S4    | 0.218 | 1.025 | 0.501 | 1.053 |
| G2G2S2/G2G2S4   | 0.715 | 0.928 | 0.188 | 0.881 |
| G2G2S3/G2G2S4   | 0.311 | 1.054 | 0.460 | 1.002 |
| G2G3FS/G2G3FS2  | 0.811 | 0.989 | 0.459 | 1.037 |
| G2G3FS/G2G3FS3  | 0.670 | 0.974 | 0.541 | 0.999 |
| G2G3FS2/G2G3FS3 | 0.455 | 0.924 | 0.837 | 1.064 |
| G2G4/G2G4S      | 0.431 | 0.939 | 0.737 | 1.046 |
| G2G4/G2G4S2     | 0.606 | 1.026 | 0.885 | 1.038 |
| G2G4/G2G4S3     | 0.864 | 1.014 | 0.316 | 0.917 |
| G2G4S/G2G4S2    | 0.881 | 1.014 | 0.111 | 0.968 |
| G2G4S/G2G4S3    | 0.648 | 1.014 | 0.781 | 1.059 |
| G2G4S2/G2G4S3   | 0.353 | 1.075 | 0.680 | 1.012 |
| G2G3FS/G2G3S    | 0.128 | 0.864 | 0.531 | 1.011 |
| G2G3FS2/G2G3S2  | 0.131 | 0.800 | 0.856 | 1.024 |
| G2G3FS3/G2G3S3  | 0.378 | 1.003 | 0.208 | 0.793 |
| S1              | 0.421 | 0.987 | 0.248 | 0.795 |
| S2              | 0.060 | 0.917 | 0.716 | 1.039 |
| S3              | 0.102 | 0.891 | 0.932 | 1.015 |
| S4              | 0.418 | 1.021 | 0.406 | 0.951 |
| S               | 0.240 | 0.915 | 0.846 | 1.053 |
| F               | 0.738 | 0.938 | 0.369 | 0.978 |

BLDs, n=236; NSCLC, n=272.

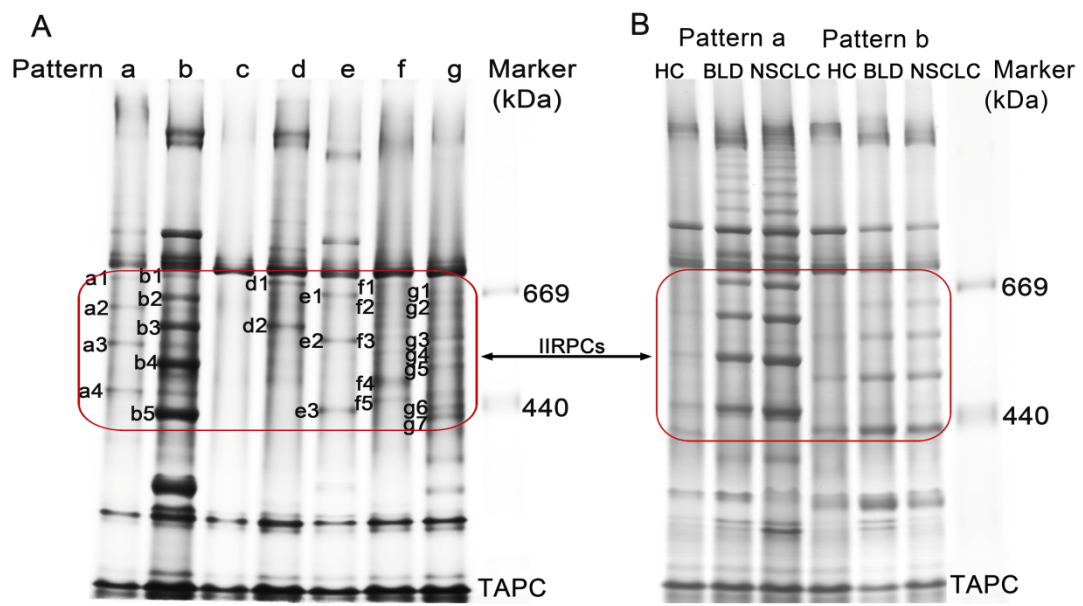

**Figure S1.** Serum IIRPCs isolated by native-PAGE. HC, healthy control; IIRPCs, immunoinflammation-related protein complexes; TAPC, transferrin-related protein complex.

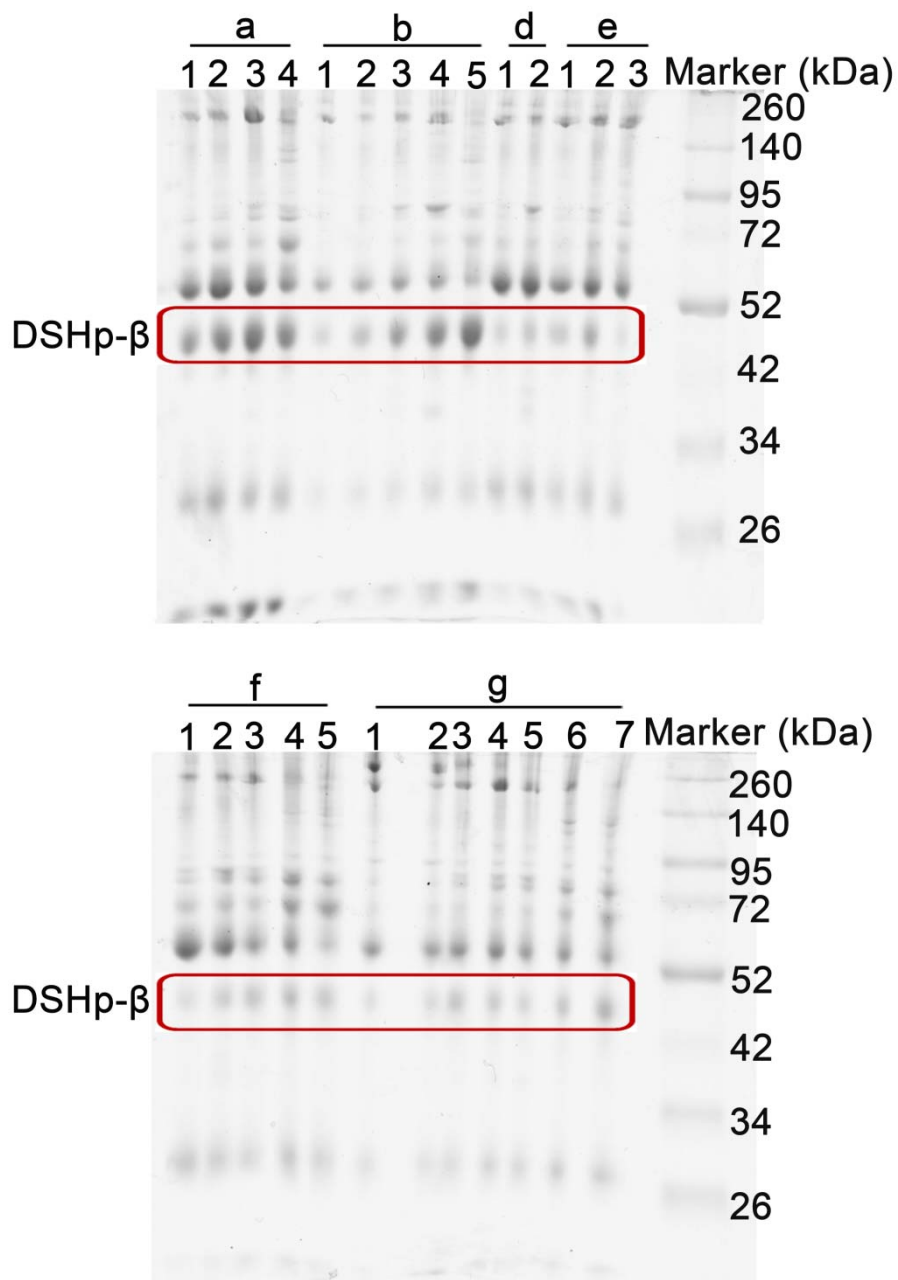

**Figure S2.** Isolation of DSHp- $\beta$  from serum IIRPCs by SDS-PAGE. DSHp- $\beta$ , disease specific Hp- $\beta$ .

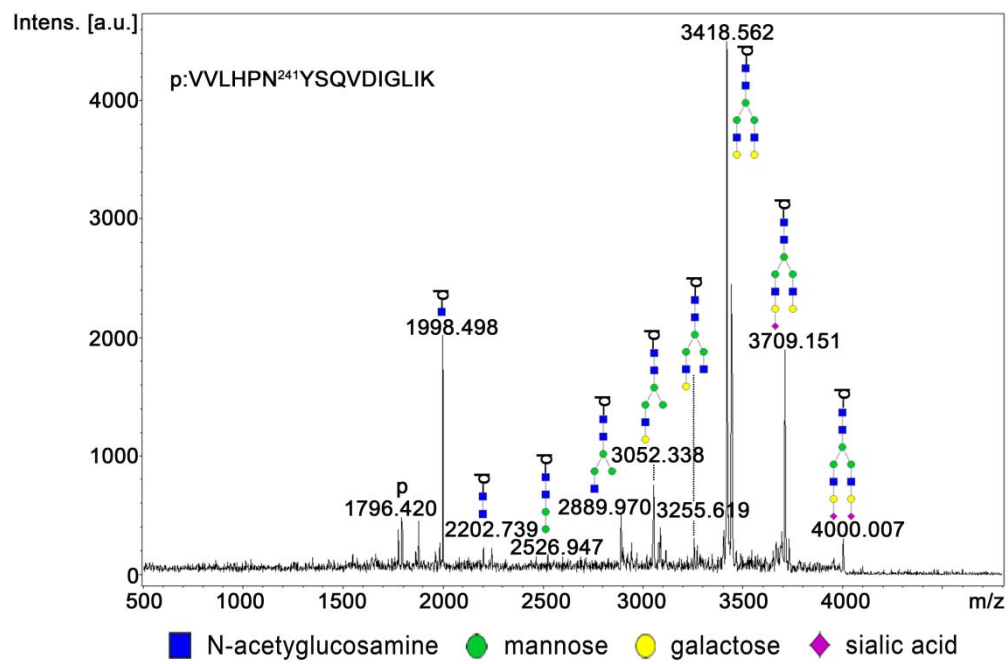

**Figure S3.** Tandem mass spectrum of G2S2 at  $m/z$  4000.007 obtained using an UltrafleXtreme MALDI-TOF/TOF mass spectrometry.
